# Supplementary material
Source: publisher figshare collection journal article supplement (https://gsajournals.figshare.com/articles/dataset/_/18114410)
Supplement: Supplementary file 2 [file 1]

1 LIST OF SUPPLEMENTAL MATERIALS

2 Supplemental Methods

3 List of strains used in this study

4 LSL-1 domains prediction and protein alignments

5 List of antibodies used in this study

6 Immunofluorescence in adult hermaphrodite gonads

7 Germline mitotic region cytological analysis

8 Fluorescence in situ hybridization (FISH)

9 Acridine orange (AO) staining

10 RNA-seq data analysis

11 Chromatin immunoprecipitation (ChIP), data processing, and analysis

12 Functional analysis

13 Supplemental Methods Bibliography

14

15 Supplemental Figures

16 Figure S1 *lsf-1* encodes a 318 aa Zinc-finger C2H2-type protein

17 Figure S2 LSL-1 homologous proteins

|    |                                                                                                            |
|----|------------------------------------------------------------------------------------------------------------|
| 18 | Figure S3 <i>lsl-1(ljm1)</i> worms exhibit <i>lsl-1(tm4769)</i> comparable altered chromatin organization  |
| 19 | in the germline and abnormal progression through meiotic prophase                                          |
| 20 | Figure S4 LSL-1 is required for the proper progression of homologous chromosome pairing                    |
| 21 | Figure S5 Analysis of the mitotic region                                                                   |
| 22 | Figure S6 Apoptosis in <i>lsl-1(ljm1)</i> mutants                                                          |
| 23 | Figure S7 Germline genes expression changes in <i>lsl-1(ljm1)</i> mutants                                  |
| 24 | Figure S8 Transgene <i>wgIs720[lsl-1::TY1::EGFP::3xFLAG]</i> resembles the <i>lsl-1</i> expression pattern |
| 25 | Figure S9 Motif analysis of LSL-1::TY1::EGFP::3XFLAG significant ChIP-seq peaks                            |
| 26 | Figure S10 LSL-1 acts mainly as a transcriptional activator of germline genes                              |
| 27 | Supplemental Figures Bibliography                                                                          |
| 28 |                                                                                                            |
| 29 | <b>Supplemental Tables</b>                                                                                 |
| 30 | Table S1 Brood size, survival rate, and incidence of males determination for both <i>lsl-1</i> alleles     |
| 31 | (at 22 °C and 25 °C)                                                                                       |
| 32 | Table S2 Cross-comparison contingency tables summary                                                       |
| 33 |                                                                                                            |
| 34 | <b>Supplemental Files</b>                                                                                  |
| 35 | File S1 DEGs summary                                                                                       |

- 36 File S2 TEA summary
- 37 File S3 DEGs in *ljm1* and *tm4769* alleles direction
- 38 File S4 LSL-1 ChIPseq results
- 39 File S5 Overlap DEGs in *lsf-1* mutants and LSL-1 bound genes
