# Supplementary material
Source: publisher figshare collection journal article supplement (https://gsajournals.figshare.com/articles/dataset/_/18114410)
Supplement: Supplementary file 3 [file 1]

## SUPPLEMENTAL METHODS

### List of strains used in this study

|         |                                                                                                               |
|---------|---------------------------------------------------------------------------------------------------------------|
| AV106:  | <i>spo-11(ok79) IV/nT1[unc-?(n754) let-?] (IV;V)</i>                                                          |
| CA1219: | <i>unc-119(ed3) III; ieSi21[sun-1p::sun-1::mRuby::sun-1 3'UTR+Cbr-unc-119(+)] IV</i>                          |
| CER414: | <i>pgl-1(cer70[pgl-1::mcherry]) IV</i>                                                                        |
| CWC14:  | <i>cep-1(gk138) Isl-1(tm4769) I/hT2[bli-4(e937)let-?(q782)qls48] (I;III)</i>                                  |
| CWC16:  | <i>Isl-1(tm4769) I/tmC18[dpy-5(tmIs1200)] I; ced-4(n1162) III</i>                                             |
| CWC17:  | <i>Isl-1(tm4769) I/hT2[bli-4(e937)let-?(q782)qls48] (I;III); spo-11(ok79) IV/nT1[unc-?(n754)let-?] (IV;V)</i> |
| CWC19:  | <i>Isl-1(ljm1) I/tmC18[dpy-5(tmIs1200)] I</i>                                                                 |
| CWC22:  | <i>Isl-1(tm4769) I/tmC18[dpy-5(tmIs1200)] I</i>                                                               |
| CWC39:  | <i>Isl-1(ljm1) I/tmC18[dpy-5(tmIs1200)]I; ieSi21[sun-1p::sun-1::mRuby::sun-1 3'UTR+Cbr-unc-119(+)] IV</i>     |
| CWC40:  | <i>Isl-1(ljm1) I/tmC18[dpy-5(tmIs1200)] I; hpl-2(tm1489) III</i>                                              |
| CWC41:  | <i>Isl-1(ljm1) I/tmC18[dpy-5(tmIs1200)] I; met-2(n4256) III</i>                                               |
| CWC44:  | <i>Isl-1(tm4769) I/tmC18[dpy-5(tmIs1200)] I; hpl-2(tm1489) III</i>                                            |
| CWC45:  | <i>Isl-1(tm4769) I/tmC18[dpy-5(tmIs1200)] I; met-2(n4256) III</i>                                             |
| CWC48:  | <i>pgl-1(cer70[pgl-1::mcherry]) IV; wglS720[Isl-1::TY1::EGFP::3xFLAG+unc-119(+)] ?</i>                        |
| CWC50:  | <i>Isl-1(syb3772[Isl-1::GFP]) I; pgl-1(cer70[pgl-1::mcherry]) IV</i>                                          |
| CWC54:  | <i>Isl-1(tm4769) I/tmC18[dpy-5(tmIs1200)]I;ieSi21[sun-1p::sun-1::mRuby::sun-1 3'UTR+Cbr-unc-119(+)] IV</i>    |
| CWC59:  | <i>Isl-1(ljm1) I/tmC18[dpy-5(tmIs1200)] I; met-2(n4256) set-25(n5021) III</i>                                 |
| CWC60:  | <i>Isl-1(ljm1) I/tmC18[dpy-5(tmIs1200)] I; hpl-1(tm1624) X</i>                                                |

25 CWC67: *lsl-1(tm4769) I/tmC18[dpy-5(tm1s1200)] I; hpl-1(tm1624) X*

26 CWC70: *lsl-1(ljm1) I/tmC18[dpy-5(tm1s1200)] I; let-418(n3536) V*

27 CWC76: *lsl-1(tm4769) I/tmC18[dpy-5(tm1s1200)] I; met-2(n4256) set-25(n5021) III*

28 CWC9: *plk-2(ok1936) lsl-1(tm4769) I/hT2[bli-4(e937)let-?(q782)qls48] (I;III)*

29 FR1469: *lsl-1(tm4769) I/hT2[bli-4(e937)let-?(q782)qls48] (I;III)*

30 FR1470: *lsl-1(tm4769) I/hT2[bli-4(e937)let-?(q782)qls48] (I;III); let-418(n3536) V*

31 FR843: *let-418(n3536) V*

32 GW638: *met-2(n4256) set-25(n5021) III*

33 MT13293: *met-2(n4256) III*

34 MT2547: *ced-4(n1162) III*

35 OP720: *unc-119(tm4063) III; wgl-720[lsl-1::TY1::EGFP::3xFLAG+unc-119(+)] ?*

36 PFR40: *hpl-2(tm1489) III*

37 PFR60: *hpl-1(tm1624) X*

38 PHX3772: *lsl-1(syb3772[lsl-1::GFP]) I*

39 RB1583: *plk-2(ok1936) I*

40 VC172: *cep-1(gk138) I*

41

42 The loss-of-function allele *lsl-1(ljm1)* of the strain CWC19: *lsl-1(ljm1) I/tmC18[dpy-*  
 43 *5(tm1s1200)] I* was generated by CRISPR/CAS9 system, using plK155 (*Peft-3::Cas9::tbb-2 3'UTR*)  
 44 and AF-ZF-827 oligonucleotide *dpy-10 (cn64)* CRISPR tools described in (Arribere *et al.* 2014  
 45 and Katic *et al.* 2015), respectively. Guide RNA was cloned from pMB70, a kind gift from Mike  
 46 Boxem (Department of Biology Utrecht University; Utrecht, The Netherlands) (Waijers *et al.*  
 47 2013). We inserted two consecutive stop codons at the endogenous *lsl-1* locus, 27 bp  
 48 downstream the translational initiation site (TIS). The repair template oligonucleotide used was

49 prCW206:  
50 aaaattttatttttacttcagATGTCAATTATTGATGACCGAACGGATTGATCTTAAGACGGCGAGGACTACG  
51 AAGCTTCTATAACGgtattttatttcgattctta.

52 FR1469: *Isl-1(tm4769) I/hT2[bli-4(e937)let-?(q782)qls48] (I;III)* strain was generated from  
53 FX04769: *Isl-1(tm4769) I/(+) I*, which was provided by the National Bioresource Project, *C.*  
54 *elegans* Gene Knockout Consortium; Tokyo, Japan (*C. elegans* Deletion Mutant Consortium  
55 2012).

56 AV106 strain, *spo-11(ok79) IV/nT1[unc-?(n754) let-?] (IV;V)*, was a kind gift from Anne  
57 M. Villeneuve (Stanford University School of Medicine; Stanford CA, USA). CER414 strain, *pgl-*  
58 *1 (cer70[pgl-1::mcherry]) IV*, was kindly provided by Julian Ceron (*C. elegans* Core Facility-  
59 IDIBELL; Barcelona, Spain). PHX3772: *Isl-1(syb3772)* is a CRISPR/Cas9 knock-in of GFP sequence  
60 at the C-terminal in the endogenous site of *Isl-1* gene, which was generated by SunyBiotech  
61 Company (Fuzhou, China). All other strains used in this study were provided by or generated  
62 using strains from the *Caenorhabditis* Genetics Center (CGC, University of Minnesota;  
63 Minneapolis MN, USA) funded by the National Institutes of Health (NIH; Bethesda MD, USA).

64

## 65 LSL-1 domains prediction and protein alignments

66 Protein domains for LSL-1 full-length sequence were predicted by different bioinformatic tools:  
67 ScanProsite, available online at <https://prosite.expasy.org/scanprosite> (de Castro *et al.* 2006);  
68 SMART, at <https://smart.embl.de> (Schultz *et al.* 1998; Letunic *et al.* 2021); and Pfam, at  
69 <http://pfam.xfam.org> (Sonnhammer *et al.* 1996; Mistry *et al.* 2021). LSY-2 was identified as the  
70 closest homolog of LSL-1 by BLASTp analysis with *C. elegans* proteins. BLASTp is accessible  
71 online at <https://blast.ncbi.nlm.nih.gov/Blast.cgi> (Altschul *et al.* 1990; Boratyn *et al.* 2012).  
72 ZFP57 was identified as the closest human ortholog of LSL-1 by the bioinformatic tools

ALLIANCE, available through the platform <https://www.alliancegenome.org> (The Alliance of Genome Resources Consortium *et al.* 2020), and PhylomeDB, at <http://phylomedb.org> (Huerta-Cepas *et al.* 2007), using gene phylogenetic trees predictions. Alignments between LSL-1 and its orthologs were performed by BLASTp analysis, and similarity was calculated for the sequence alignments displayed in the Supplemental Material, Figure S2.

#### List of antibodies used in this study

Primary antibodies: guinea pig  $\alpha$ -HIM-8 1:100 was kindly provided by Abby F. Dernburg (Phillips *et al.* 2005); rabbit  $\alpha$ -HTP-3 1:200 was a gift from Monique Zetka (Goodyer *et al.* 2008); and mouse  $\alpha$ -Histone H3 Ser10-p (Upstate # 05-866) was used at 1:200.

All secondary antibodies were used at a concentration of 1:200: goat  $\alpha$ -rabbit FITC (Jackson ImmunoResearch # 111-095-003); donkey  $\alpha$ -guinea pig FITC (Jackson ImmunoResearch # 706-005-148); and goat  $\alpha$ -mouse TRITC (Sigma Aldrich # T5393).

#### Immunofluorescence in adult hermaphrodite gonads

Worms were dissected (Crittenden *et al.* 1994) in 1x egg buffer [25mM HEPES-NaOH, 118mM NaCl, 48mM KCl, 2mM EDTA and 0.5mM EGTA], 0.1% Tween-20, 20mM NaN<sub>3</sub> (EBTA) 24 h post-L4 stage to extrude the gonads and then fixed with 2% formaldehyde for 5 min and flash-frozen on positively charged slides placed on a metal block previously cooled in dry ice. These were then permeabilized by freeze-cracking, postfixed in methanol at -20 °C for 1 min and transferred to 1x phosphate-buffered saline, 0.1% Tween-20 (PBST) at room temperature. Fixed samples were incubated at 4 °C overnight in the primary antibody dilution, washed 3 × 10 min in PBST, and then incubated with the secondary antibody at room temperature for 2 h. Slides were washed 3 × 10 min in PBST, adding 2  $\mu$ g/ml 2-(4-amidinophenyl)-1H-indole-6-

carboxamidine (DAPI) for 2 min between the second and third washes. Finally, these were mounted with Vectashield H-1000 antifade mounting medium (Vector Laboratories; Burlingame CA, USA), stored at 4 °C, and imaged. To detect endogenous expression of *Isl-1::GFP* and *pgl-1::mCherry*, 1-day adult hermaphrodites were fixed as described above and washed 3 × 10 min in PBST, with DAPI added for 2 min between the second and third washes.

### **Germline mitotic region cytological analysis**

To analyze the germline mitotic region, at least 20 gonads of each genotype were immunostained using mouse  $\alpha$ -Histone H3 Ser10-p antibody (PH3) and DAPI to counterstain DNA. Total number of germ nuclei in the mitotic region was quantified between the distal tip and the transition zone, defining the distal transition zone limit as the first germ cells row where at least two nuclei showed the characteristic crescent shape (Crittenden *et al.* 2006). The mitotic region length was measured in nuclei rows from the distal tip to the transition zone limit, and the mitotic index was determined by the number of PH3-positive nuclei over the total number of germ nuclei in the mitotic region (Maciejowski *et al.* 2006).

### **Fluorescence *in situ* hybridization (FISH)**

FISH probe hybridization was adapted from (Phillips *et al.* 2009). Briefly, worms were dissected (Crittenden *et al.* 1994) 24 h post-L4 stage to extrude the gonads in EBTA, then fixed with 0.8% ethyleneglycol bis(succinimidylsuccinate) (EGS) in dimethyl formamide for 2 min on positively charged slides, and then incubated in a humid chamber at room temperature for 30 min. Slides were then flash-frozen placed on a metal block previously cooled in dry ice. Next, these were permeabilized by freeze-cracking, postfixed in methanol at –20°C for 1 min, and immediately transfer to 2x saline-sodium citrate, 0.1% Tween-20 (2xSSCT) at room temperature. Slides were

incubated in 2x egg buffer, 7.4% formaldehyde (EBF) for 5 min and then rinsed 3 x 5 min in 2xSSCT, adding 50% formamide in 2xSSCT dilution for 5 min between the second and third washes. After the third 2xSSCT wash, slides were incubated in 50% formamide in 2xSSCT dilution at 37 °C overnight prior to adding of FISH probe at 37 °C. DNA was denatured for 3 min at 95 °C, and hybridization was carried out overnight at 37 °C in a dark humid chamber. After hybridization, slides were again incubated 1 h in 50% formamide in 2xSSCT dilution at 37 °C and washed in 2xSSCT for 10 min, adding 2 µg/ml DAPI for 2 min and finally washing in 2xSSCT for at least 30 min. Slides were then mounted with Vectashield H-1000, stored in darkness at 4 °C, and imaged.

#### **Acridine orange (AO) staining**

Adult hermaphrodite worms, 24-h post-L4-stage, were incubated for 1 h at room temperature and darkness, in plates previously treated with 20µg/ml AO in M9. Then, worms were transferred to clean plates to remove excess of AO, kept in darkness at room temperature for 2 h, and mounted in 2% agar slides. A minimum of 24 gonads per genotype were analyzed, and each scoring experiment was performed with mutant strains and N2 running in parallel. Number of apoptotic corpses per gonad arm was scored using a fluorescence microscope Leica DM1000 LED. Data were pooled from multiple rounds of analyses, and statistical comparison between genotypes was assessed using two-tailed Student's *t*-test with Welch's correction, *p*-value ≤ 0.05.

#### **RNA-seq data analysis**

The quality of the reads was confirmed with FastQC, retrieved from <http://www.bioinformatics.babraham.ac.uk/projects/fastqc/>, and the reads were aligned to

the *C. elegans* reference genome (version WS220) with TopHat (version 2.1.1)/Bowtie2 (version 2.2.8.0) (Langmead and Salzberg 2012; Kim *et al.* 2013) to obtain the *.bam* files. Read count by gene was obtained by HTSeq-count (Anders *et al.* 2015), and differential gene expression analyses *lsl-1(tm4769)* vs. wild-type, and *lsl-1(ljm1)* vs. wild-type were performed using DESeq2 package (Love *et al.* 2014). Read counts were normalized by estimating size factors, and differential expression was tested against the negative binomial distribution using the Wald test. Multiple test correction was performed via optimized false discovery rate (FDR) approach to obtain an adjusted *p*-value (*q*-value) (Storey and Tibshirani 2003). Genes were defined as differentially expressed genes (DEGs) with a *q*-value  $\leq 0.01$  (minimum FDR) and  $-2 \leq \text{fold change} \leq 2$  cutoff. Final lists of significant DEGs for each comparison were converted to Excel sheets; processed lists together with DESeq2 raw data outcome are provided in File S1.

Tissue enrichment analysis for DEGs was performed separately for upregulated and downregulated genes using the Wormbase tool T.E.A. (Angeles-Albores *et al.* 2016). Enriched terms were found significant with an adj. *p*-value  $\leq 0.05$  obtained from the FDR correction using the Benjamini–Hochberg algorithm; lists of these significant terms were converted to Excel sheets for both *lsl-1(tm4769)* vs. wild-type and *lsl-1(ljm1)* vs. wild-type comparisons and are presented in File S2. Before uploading the DEGs to the T.E.A. resource, genes names were updated to the last Wormbase release at the moment (WS276), using SimpleMine and Gene Name Sanitizer tools available at: <https://wormbase.org/tools>.

## Chromatin immunoprecipitation (ChIP), data processing, and analysis

ChIP-seq experiment was conducted by the modERN consortium (Kudron *et al.* 2018) in young adult worms of the *C. elegans* strain OP720, which carry LSL-1::TY1::EGFP::3XFLAG fusion protein (two biological replicates); IP was performed using an anti-GFP antibody.

Sequencing data were aligned to the *C. elegans* reference genome (version WS245) using the Burrows–Wheeler aligner (BWA) (Li and Durbin 2009). Regions significantly enriched in aligned reads were peak-called using ChIP-seq pipeline SPP (Kharchenko *et al.* 2008). Peaks above an irreproducibility discovery rate (IDR) of 0.1% were used to generate the final peaks set (Landt *et al.* 2012). We uploaded the *.bed* optimal IDR thresholded peaks file, available in the modERN website under the accession number ENCFF435YQE, to the Galaxy web platform using the public server at <https://usegalaxy.org> to analyze the data (Afgan *et al.* 2016). ChIPseeker R/bioconductor package (version 1.18.0) (Yu *et al.* 2015) was used to annotate the *.bed* file. The nearest feature was used with promoter region defined as 2000 bp upstream of a gene, and intergenic region defined as 5000 bp between genes. List of annotated genes bound by LSL-1 was converted to Excel sheets and processed, noncoding RNA genes and genes targeted by high-occupancy target (HOT) regions (black list) (Niu *et al.* 2011) were filtered to obtain the final LSL-1 targeted gene list provided in File S3.

We searched for enriched motifs binding sites of LSL-1 using MEME-ChIP (version 4.11.2) web-based tool (Machanick and Bailey 2011). Input data for MEME-ChIP were composed by central region of the binding sites of 200-bp, thus delimiting this central region as 100 bp around its summit. This range has been reported (Niu *et al.* 2011) to be appropriate for the majority of the enriched motifs for the transcription factors presented in Gerstein *et al.* 2010. The optimal IDR thresholded peaks (IDR 0.1%) obtained from the modERN consortium were chosen for motif discovery. Most significant motifs found by MEME-ChIP were sorted by their e-value, computed by the motif discovery software DREME (Bailey 2011) and MEME (Bailey and Elkan 1994), and presented in Figure S9.



Genome-wide LSL-1 binding profiles were visualized and aligned to the *C. elegans* genome (version WS245) using the Integrated Genome Viewer (IGV) (Thorvaldsdottir *et al.* 2013).

## Functional analysis

Cross comparison of our RNA-seq data and the LSL-1::TY1::EGFP::3XFLAG ChIP-seq analysis showed a significant overlap for both *ls/-1* mutant alleles. Prior to comparing RNA-seq DEGs and ChIP-seq LSL-1 targeted gene lists, gene public names were updated to the last Wormbase release at that time (WS276) using SimpleMine and Gene Name Sanitizer tools available at: <https://wormbase.org/tools>. Statistical significance was assessed using cross comparison contingency tables by chi-square test with Yates correction, calculated using GraphPad QuickCalcs available at <http://www.graphpad.com/quickcalcs/Contingency1.cfm>, and presented in Table S2.

Gene ontology (GO) term functional analysis was performed in both *ls/-1* mutant alleles for downregulated genes bound by LSL-1 at their promoter region, using the database for annotation, visualization, and integrated discovery (DAVID version 6.8) NIAID/NIH tool (Huang *et al.* 2009). Significant GO terms ( $p$ -value  $\leq 0.05$ , unadjusted) are shown, once clustered for most significant categories, in Figure 7B' and Figure S10 C.

## SUPPLEMENTAL METHODS BIBLIOGRAPHY

Afgan E., D. Baker, M. van den Beek, D. Blankenberg, D. Bouvier, *et al.*, 2016 The Galaxy platform for accessible, reproducible and collaborative biomedical analyses: 2016 update. Nucleic Acids Res. 44: W3–W10. <https://doi.org/10.1093/nar/gkw343>

214 Altschul S. F., W. Gish, W. Miller, E. W. Myers, and D. J. Lipman, 1990 Basic Local Alignment  
 215 Search Tool. J. Mol. Biol. 215: 403–410. [https://doi.org/10.1016/S0022-](https://doi.org/10.1016/S0022-2836(05)80360-2)  
 216 [2836\(05\)80360-2](https://doi.org/10.1016/S0022-2836(05)80360-2)  
 217 Anders S., P. T. Pyl, and W. Huber, 2015 HTSeq--a Python framework to work with high-  
 218 throughput sequencing data. Bioinformatics 31: 166–169.  
 219 <https://doi.org/10.1093/bioinformatics/btu638>  
 220 Angeles-Albores D., R. Y. N. Lee, J. Chan, and P. W. Sternberg, 2016 Tissue enrichment  
 221 analysis for *C. elegans* genomics. BMC Bioinformatics 17: 366.  
 222 <https://doi.org/10.1186/s12859-016-1229-9>  
 223 Arribere J. A., R. T. Bell, B. X. H. Fu, K. L. Artiles, P. S. Hartman, *et al.*, 2014 Efficient Marker-  
 224 Free Recovery of Custom Genetic Modifications with CRISPR/Cas9 in *Caenorhabditis*  
 225 *elegans*. Genetics 198: 837–846. <https://doi.org/10.1534/genetics.114.169730>  
 226 Bailey T. L., and C. Elkan, 1994 Fitting a mixture model by expectation maximization to  
 227 discover motifs in biopolymers. Proc. Int. Conf. Intell. Syst. Mol. Biol. 2: 28–36.  
 228 Bailey T. L., 2011 DREME: motif discovery in transcription factor ChIP-seq data. Bioinformatics  
 229 27: 1653–1659. <https://doi.org/10.1093/bioinformatics/btr261>  
 230 Boratyn G. M., A. A. Schäffer, R. Agarwala, S. F. Altschul, D. J. Lipman, *et al.*, 2012 Domain  
 231 enhanced lookup time accelerated BLAST. Biol. Direct 7: 1–12.  
 232 <https://doi.org/10.1186/1745-6150-7-12>  
 233 *C. elegans* Deletion Mutant Consortium, 2012 Large-Scale Screening for Targeted Knockouts  
 234 in the *Caenorhabditis elegans* Genome. G3 GenesGenomesGenetics 2: 1415–1425.  
 235 <https://doi.org/10.1534/g3.112.003830>  
 236 Castro E. de, C. J. A. Sigrist, A. Gattiker, V. Bulliard, P. S. Langendijk-Genevaux, *et al.*, 2006  
 237 ScanProsite: detection of PROSITE signature matches and ProRule-associated

238 functional and structural residues in proteins. *Nucleic Acids Res.* 34: W362–W365.  
 239 <https://doi.org/10.1093/nar/gkl124>  
 240 Crittenden S. L., E. R. Troemel, T. C. Evans, and J. Kimble, 1994 GLP-1 is localized to the  
 241 mitotic region of the *C. elegans* germ line. *Development* 120: 2901–2911.  
 242 Crittenden S. L., K. A. Leonhard, D. T. Byrd, and J. Kimble, 2006 Cellular Analyses of the  
 243 Mitotic Region in the *Caenorhabditis elegans* Adult Germ Line, (J. Schwarzbauer, Ed.).  
 244 *Mol. Biol. Cell* 17: 3051–3061. <https://doi.org/10.1091/mbc.e06-03-0170>  
 245 Gerstein M. B., Z. J. Lu, E. L. Van Nostrand, C. Cheng, B. I. Arshinoff, *et al.*, 2010 Integrative  
 246 Analysis of the *Caenorhabditis elegans* Genome by the modENCODE Project. *Science*  
 247 330: 1775–1787. <https://doi.org/10.1126/science.1196914>  
 248 Goodyer W., S. Kaitna, F. Couteau, J. D. Ward, S. J. Boulton, *et al.*, 2008 HTP-3 Links DSB  
 249 Formation with Homolog Pairing and Crossing Over during *C. elegans* Meiosis. *Dev.*  
 250 *Cell* 14: 263–274. <https://doi.org/10.1016/j.devcel.2007.11.016>  
 251 Huang D. W., B. T. Sherman, and R. A. Lempicki, 2009 Bioinformatics enrichment tools: paths  
 252 toward the comprehensive functional analysis of large gene lists. *Nucleic Acids Res.*  
 253 37: 1–13. <https://doi.org/10.1093/nar/gkn923>  
 254 Huerta-Cepas J., H. Dopazo, J. Dopazo, and T. Gabaldón, 2007 The human phylome. *Genome*  
 255 *Biol.* 8: R109. <https://doi.org/10.1186/gb-2007-8-6-r109>  
 256 Katic I., L. Xu, and R. Ciosk, 2015 CRISPR/Cas9 Genome Editing in *Caenorhabditis elegans* :  
 257 Evaluation of Templates for Homology-Mediated Repair and Knock-Ins by Homology-  
 258 Independent DNA Repair. *G3 GenesGenomesGenetics* 5: 1649–1656.  
 259 <https://doi.org/10.1534/g3.115.019273>

260 Kharchenko P. V., M. Y. Tolstorukov, and P. J. Park, 2008 Design and analysis of ChIP-seq  
 261 experiments for DNA-binding proteins. *Nat. Biotechnol.* 26: 1351–1359.  
 262 <https://doi.org/10.1038/nbt.1508>

263 Kim D., G. Pertea, C. Trapnell, H. Pimentel, R. Kelley, *et al.*, 2013 TopHat2: accurate alignment  
 264 of transcriptomes in the presence of insertions, deletions and gene fusions. *Genome*  
 265 *Biol.* 14: R36. <https://doi.org/10.1186/gb-2013-14-4-r36>

266 Kudron M. M., A. Victorsen, L. Gevirtzman, L. W. Hillier, W. W. Fisher, *et al.*, 2018 The  
 267 ModERN Resource: Genome-Wide Binding Profiles for Hundreds of *Drosophila* and  
 268 *Caenorhabditis elegans* Transcription Factors. *Genetics* 208: 937–949.  
 269 <https://doi.org/10.1534/genetics.117.300657>

270 Landt S. G., G. K. Marinov, A. Kundaje, P. Kheradpour, F. Pauli, *et al.*, 2012 ChIP-seq guidelines  
 271 and practices of the ENCODE and modENCODE consortia. *Genome Res.* 22: 1813–  
 272 1831. <https://doi.org/10.1101/gr.136184.111>

273 Langmead B., and S. L. Salzberg, 2012 Fast gapped-read alignment with Bowtie 2. *Nat.*  
 274 *Methods* 9: 357–359. <https://doi.org/10.1038/nmeth.1923>

275 Letunic I., S. Khedkar, and P. Bork, 2021 SMART: recent updates, new developments and  
 276 status in 2020. *Nucleic Acids Res.* 49: D458–D460.  
 277 <https://doi.org/10.1093/nar/gkaa937>

278 Li H., and R. Durbin, 2009 Fast and accurate short read alignment with Burrows-Wheeler  
 279 transform. *Bioinformatics* 25: 1754–1760.  
 280 <https://doi.org/10.1093/bioinformatics/btp324>

281 Love M. I., W. Huber, and S. Anders, 2014 Moderated estimation of fold change and  
 282 dispersion for RNA-seq data with DESeq2. *Genome Biol.* 15: 550.  
 283 <https://doi.org/10.1186/s13059-014-0550-8>

284 Machanick P., and T. L. Bailey, 2011 MEME-ChIP: motif analysis of large DNA datasets.  
 285 Bioinformatics 27: 1696–1697. <https://doi.org/10.1093/bioinformatics/btr189>

286 Maciejowski J., N. Ugel, B. Mishra, M. Isopi, and E. J. A. Hubbard, 2006 Quantitative analysis  
 287 of germline mitosis in adult *C. elegans*. Dev. Biol. 292: 142–151.  
 288 <https://doi.org/10.1016/j.ydbio.2005.12.046>

289 Mistry J., S. Chuguransky, L. Williams, M. Qureshi, G. A. Salazar, *et al.*, 2021 Pfam: The protein  
 290 families database in 2021. Nucleic Acids Res. 49: D412–D419.  
 291 <https://doi.org/10.1093/nar/gkaa913>

292 Niu W., Z. J. Lu, M. Zhong, M. Sarov, J. I. Murray, *et al.*, 2011 Diverse transcription factor  
 293 binding features revealed by genome-wide ChIP-seq in *C. elegans*. Genome Res. 21:  
 294 245–254. <https://doi.org/10.1101/gr.114587.110>

295 Phillips C. M., C. Wong, N. Bhalla, P. M. Carlton, P. Weiser, *et al.*, 2005 HIM-8 Binds to the X  
 296 Chromosome Pairing Center and Mediates Chromosome-Specific Meiotic Synapsis.  
 297 Cell 123: 1051–1063. <https://doi.org/10.1016/j.cell.2005.09.035>

298 Phillips C. M., K. L. McDonald, and A. F. Dernburg, 2009 Cytological Analysis of Meiosis in  
 299 *Caenorhabditis elegans*, pp. 171–195 in *Meiosis*, edited by Keeney S. Humana Press,  
 300 Totowa, NJ.

301 Schultz J., F. Milpetz, P. Bork, and C. P. Ponting, 1998 SMART, a simple modular architecture  
 302 research tool: Identification of signaling domains. Proc. Natl. Acad. Sci. 95: 5857–  
 303 5864. <https://doi.org/10.1073/pnas.95.11.5857>

304 Sonnhammer E. L. L., S. R. Eddy, and R. Durbin, 1996 Pfam: A comprehensive database of  
 305 protein domain families based on seed alignments. PROTEINS Struct. Funct. Genet.  
 306 28: 405–420. [https://doi.org/10.1002/\(sici\)1097-0134\(199707\)28:3<405::aid-](https://doi.org/10.1002/(sici)1097-0134(199707)28:3<405::aid-prot10>3.0.co;2-l)  
 307 [prot10>3.0.co;2-l](https://doi.org/10.1002/(sici)1097-0134(199707)28:3<405::aid-prot10>3.0.co;2-l)

308 Storey J. D., and R. Tibshirani, 2003 Statistical significance for genomewide studies. *Proc. Natl.*  
 309 *Acad. Sci.* 100: 9440–9445. <https://doi.org/10.1073/pnas.1530509100>  
 310 The Alliance of Genome Resources Consortium, J. Agapite, L.-P. Albou, S. Aleksander, J.  
 311 Argasinska, *et al.*, 2020 Alliance of Genome Resources Portal: unified model organism  
 312 research platform. *Nucleic Acids Res.* 48: D650–D658.  
 313 <https://doi.org/10.1093/nar/gkz813>  
 314 Thorvaldsdottir H., J. T. Robinson, and J. P. Mesirov, 2013 Integrative Genomics Viewer (IGV):  
 315 high-performance genomics data visualization and exploration. *Brief. Bioinform.* 14:  
 316 178–192. <https://doi.org/10.1093/bib/bbs017>  
 317 Waaijers S., V. Portegijs, J. Kerver, B. B. L. G. Lemmens, M. Tijsterman, *et al.*, 2013  
 318 CRISPR/Cas9-Targeted Mutagenesis in *Caenorhabditis elegans*. *Genetics* 195: 1187–  
 319 1191. <https://doi.org/10.1534/genetics.113.156299>  
 320 Yu G., L.-G. Wang, and Q.-Y. He, 2015 ChIPseeker: an R/Bioconductor package for ChIP peak  
 321 annotation, comparison and visualization. *Bioinformatics* 31: 2382–2383.  
 322 <https://doi.org/10.1093/bioinformatics/btv145>  
 323
