# Supplementary material
Source: publisher figshare collection journal article supplement (https://gsajournals.figshare.com/articles/dataset/_/18114410)
Supplement: Supplementary file 4 [file 1]

1 The zinc-finger transcription factor LSL-1 is a major regulator of the germline transcriptional  
2 program in *C. elegans*

3 David Rodriguez-Crespo, Magali Nanchen, Shweta Rajopadhye, Chantal Wicky

4

5 Chantal Wicky. Department of Biology, University of Fribourg, Chemin du Musée 10, 1700

6 Fribourg, Switzerland. Telephone: +41 26 300 8865. E-mail: chantal.wicky@unifr.ch

7

8 This PDF file includes:

9 Tables S1 and S2

10

11

12 Table S1 Brood size, survival rate, and incidence of males (22 °C and 25 °C)

| Genotype                              | Mean brood size <sup>a</sup> | Viability (%) | Incidence of males (%) | <i>n</i> <sup>b</sup> |
|---------------------------------------|------------------------------|---------------|------------------------|-----------------------|
| wild type <sup>22 °C</sup>            | 241.33 ± 46.45               | 98.62         | 0.07                   | 6                     |
| <i>lsl-1(tm4769)</i> <sup>22 °C</sup> | 19.92 ± 19.33***             | 0.00          | n/a                    | 12                    |
| <i>lsl-1(ljm1)</i> <sup>22 °C</sup>   | 8.75 ± 20.42***              | 22.86         | 8.33                   | 12                    |
| wild type <sup>25 °C</sup>            | 196.43 ± 42.37               | 94.46         | 0.09                   | 46                    |
| <i>lsl-1(tm4769)</i> <sup>25 °C</sup> | 0.05 ± 0.22***               | 0.00          | n/a                    | 40                    |
| <i>lsl-1(ljm1)</i> <sup>25 °C</sup>   | 0.13 ± 0.41***               | 20.00         | 0.00                   | 38                    |

13 <sup>a</sup> Data correspond to the mean ± SD of the total number of eggs laid per hermaphrodite parent. Statistical  
 14 comparison between wild type and each genotype performed by two-tailed Student's *t*-test with Welch's  
 15 correction. \*\*\* *p*-value ≤ 0.001.

16 <sup>b</sup> Total number of parental hermaphrodites per genotype.

17 n/a not applicable

18

19 Table S2 Cross-comparison contingency tables summary

| RNA-seq sample                    | DEGs | LSL-1 binding sites ( $n = 3078$ ) | $p$ -value |
|-----------------------------------|------|------------------------------------|------------|
| <i>lsl-1(tm4769)</i> vs wild type | 2078 | 388                                | 0.0001***  |
| <i>lsl-1(ljm1)</i> vs wild type   | 496  | 53                                 | 0.0061**   |

20 DEGs, differentially expressed genes; \*\*\* $p$ -value  $\leq 0.001$ , \*\* $p$ -value  $\leq 0.01$ , by chi-square test with Yates

21 correction.
